# Supplementary material for: Modulation of the doping level of PEDOT:PSS film by treatment with hydrazine to improve the Seebeck coefficient
Source: PubMed Central journal article supplement — RSC Adv. 2020 Jan 9;10(3):1786–92. doi: 10.1039/c9ra07648d (PMC9047250; doi:10.1039/c9ra07648d), 2020-01-09
Supplement: RA-010-C9RA07648D-s001.pdf [file RA-010-C9RA07648D-s001.pdf]

## Supplementary Information

### **Modulation of the doping level of PEDOT:PSS film by treatment with hydrazine to improve the Seebeck coefficient**

Temesgen Atnafu Yemata,<sup>a, b, d</sup> Zheng Yun<sup>a</sup>, Aung Ko Ko Kyaw,<sup>a, c</sup> Xizu Wang,<sup>a</sup> Song Jing<sup>a</sup>, Wee Shong Chin<sup>b\*</sup> and Jian Wei Xu<sup>a, b\*</sup>

<sup>a</sup>Institute of Materials Research and Engineering; Agency for Science, Technology, and Research (A\*STAR), 2 Fusionopolis Way, Singapore 138634, Republic of Singapore

<sup>b</sup>Department of Chemistry, National University of Singapore, 3 Science Drive 3, Singapore 117543

<sup>c</sup> Department of Electrical and Electronic Engineering, Southern University of Science and Technology, Shenzhen 518055, P.R. China

<sup>d</sup> Chemical Engineering Department, Bahirdar University, Bahirdar P.O.Box 26, Ethiopia

\*Corresponding author: [jw-xu@imre.a-star.edu.sg](mailto:jw-xu@imre.a-star.edu.sg) , [chmcws@nus.edu.sg](mailto:chmcws@nus.edu.sg)

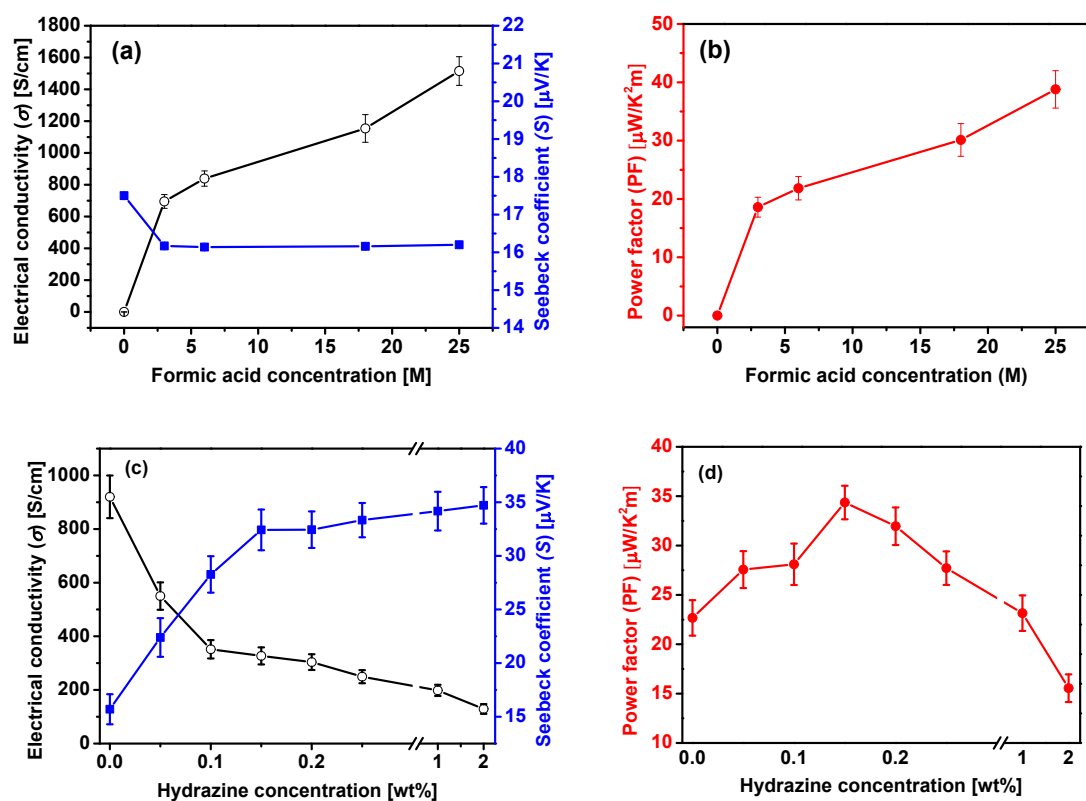

**Figure S1.** (a) Average  $\sigma$  and  $S$  and (b) PF of the PEDOT:PSS films treated with different concentrations of formic acid with error bars. The formic acid concentration at 0 refers to the films without formic acid treatment i.e. pristine film. TE properties of the EG treated PEDOT:PSS films as a function of hydrazine weight concentration (c)  $S$  and  $\sigma$ , and (d) PF. The hydrazine concentration at 0 refer to the films without hydrazine treatment, i.e. treated by EG only.

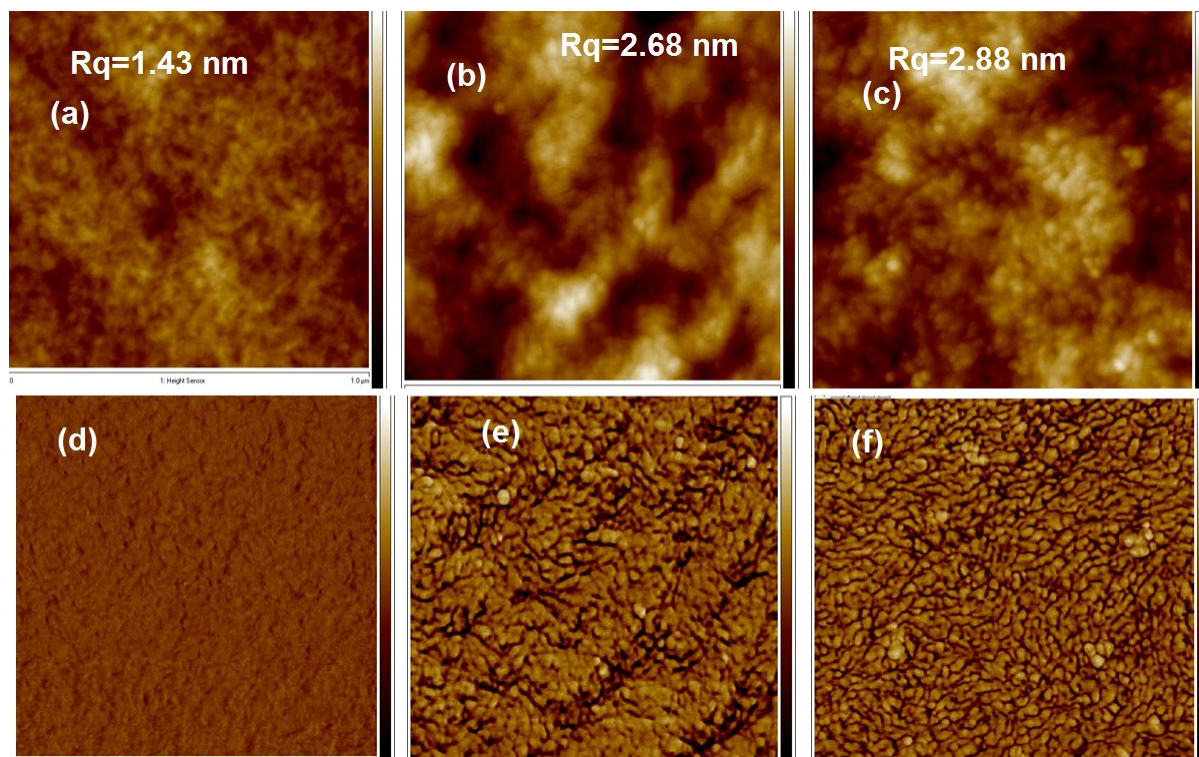

Fig

**ure S2.** AFM height images: **(a)** pristine, **(b)** formic acid/ 0.2 wt % hydrazine treated and **(c)** formic acid/ 1 wt % hydrazine treated. AFM Phase images: **(d)** pristine, **(e)** formic acid/ 0.2 wt % hydrazine treated and **(f)** formic acid/ 1 wt % hydrazine treated. All images captured with an area of  $1 \times 1 \mu\text{m}^2$ .

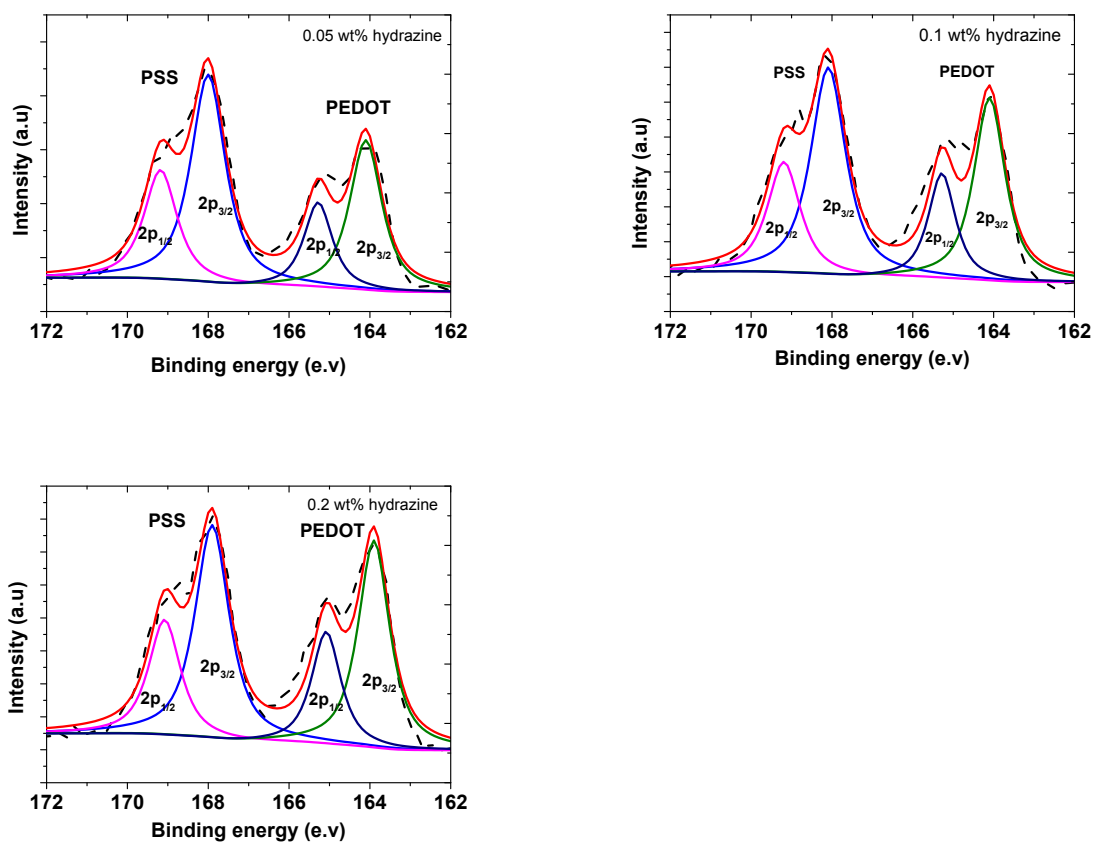

**Figure S3.** XPS spectra of (a) 0.05 wt% hydrazine, (b) 0.1 wt% hydrazine and (c) 0.2 wt% hydrazine treated PEDOT:PSS films.

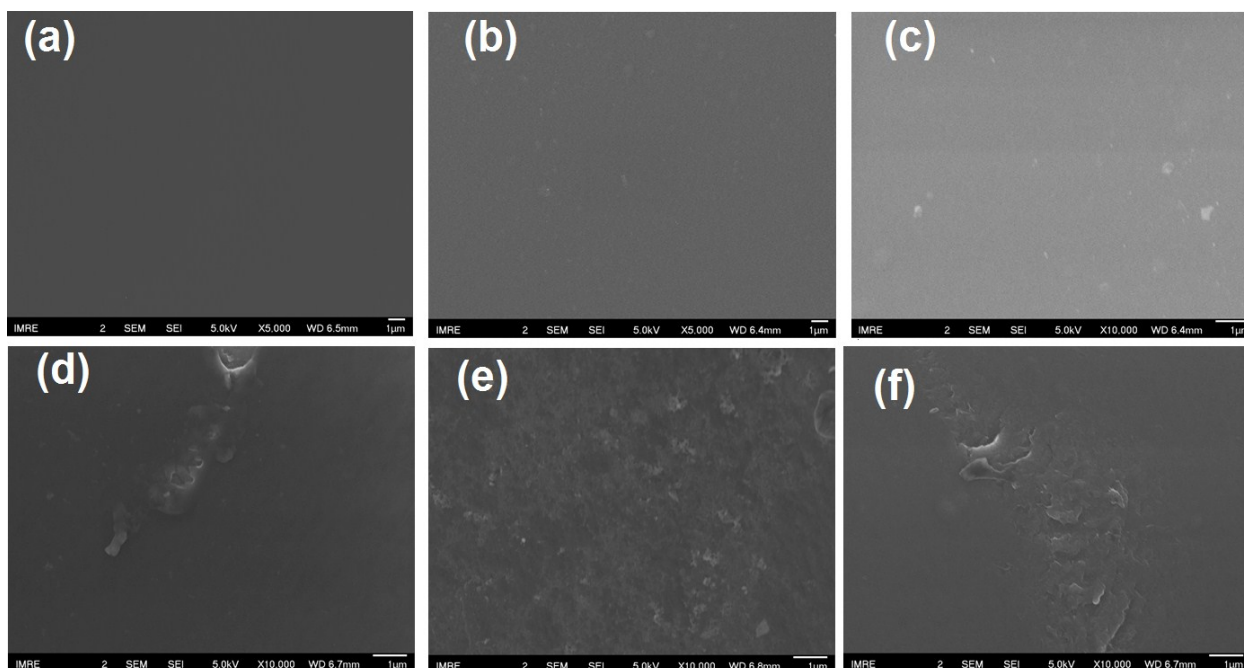

**Figure S4.** SEM images: (a) pristine, (b) formic acid 1 time treated (c) formic acid three times treated (d) formic acid-0.15wt% hydrazine pristine, (e) formic acid/ 2 wt % HZ treated and (f) EG/ 0.15 wt % HZ treated. All images captured an area of  $1 \times 1 \mu\text{m}^2$ .

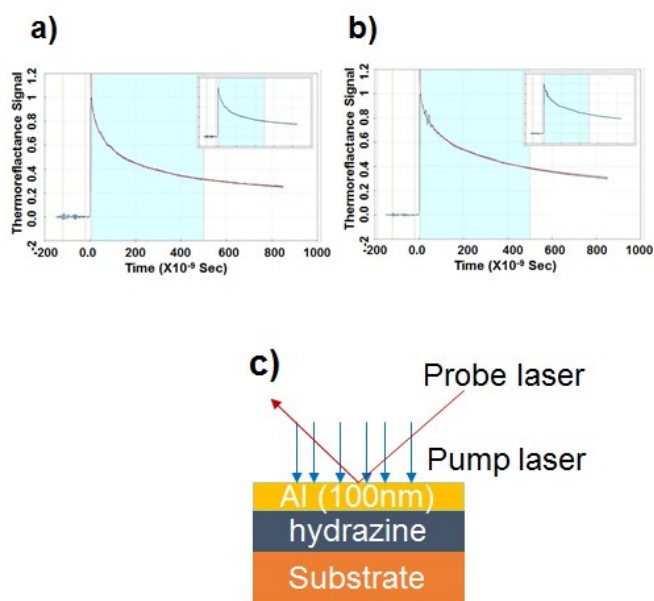

**Figure S5.** (a) The pristine and (b) treated PEDOT:PSS films normalized thermalreflectacne signals. The films coated with 100 nm-thick-Al after the nanosecond-pulse heating. The solid red lines represent the fitted temperature response curve that is used to extract the thermal effusivity of the PEDOT:PSS films and (c) The front heating, front detecting configuration used in the measurement text of the article should appear here with headings as appropriate.

**Table S1.** Treatment methods of some of PEDOT:PSS TE materials and their corresponding TE properties reported in the literature.

| Reference | Treatment methods                                              | $\sigma$<br>(S/ cm) | $S$<br>( $\mu$ V/ K) | $PF$<br>( $\mu$ W/mK <sup>2</sup> ) | $k$<br>(W/mK) | $ZT$  |
|-----------|----------------------------------------------------------------|---------------------|----------------------|-------------------------------------|---------------|-------|
| 1         | Post-treatment with DMSO/EG mixture                            | 952.8               | 19.0                 | 37.1                                | 0.17          | 0.065 |
| 2         | Dipping post-treatment H <sub>2</sub> SO <sub>4</sub>          | 1,167               | 12.1                 | 17.0                                | -             | -     |
| 3         | N,N-Dimethylformamide solution of Zinc chloride post treatment | 1400                | 26.1                 | 98.2                                | -             | -     |
| 4         | D-sorbitol addition , then vapor posttreatment with TDAE       | 295                 | 27.5                 | 22.3                                |               | 0.01  |
| 5         | Urea addition                                                  | 63.1                | 20.7                 | 2.7                                 | -             | -     |
| 6         | Formic acid post treatment                                     | 1,900               | 20.6                 | 80.6                                | -             | -     |
| 7         | Treated with hydrazine                                         | 578                 | 67.0                 | 112.0                               | 0.37          | 0.093 |
| This work | Treated with formic acid and hydrazine                         | 513                 | 42.7                 | 93.5                                | 0.30          | 0.10  |

## References

1. S. Liu, H. Deng, Y. Zhao, S. Ren and Q. Fu, *RSC Advances*, 2015, **5**, 1910-1917.
2. J. Kim, J. G. Jang, J.-I. Hong, S. H. Kim, and J. Kwak, *Journal of Materials Science: Materials in Electronics*, 2016, **27**, 6122-6127.
3. Z. Fan, D. Du, Z. Yu, P. Li, Y. Xia and J. Ouyang, *ACS Appl. Mater. Interfaces*, 2016, **8**, 23204-23211.
4. E. Yang, J. Kim, B. J. Jung, and J. Kwak, *Journal of Materials Science: Materials in Electronics*, 2015, **26**, 2838-2843.
5. F.-F. Kong, C.-C. Liu, J.-K. Xu, F.-X. Jiang, B.-Y. Lu, R.-R. Yue, G.-D. Liu and J.-M. Wang, *Chinese Physics Letters*, 2011, **28**, 037201.
6. D. A. Mengistie, C.-H. Chen, K. M. Boopathi, F. W. Pranoto, L.-J. Li and C.-W. Chu, *ACS Appl. Mater. Interfaces*, 2015, **7**, 94-100.
7. H. Park, S. H. Lee, F. S. Kim, H. H. Choi, I. W. Cheong, and J. H. Kim, *J. Mater. Chem. A*, 2014, **2**, 6532-6539.
